# Supplementary material for: Comparison of Resistance Spectra after First and Second Line Osimertinib Treatment Detected by Liquid Biopsy
Source: MDPI journal article supplement (doi:10.3390/cancers13122861), 2021-06-08
Supplement: s1 [file s1]

Supplementary

# Comparison of Resistance Spectra After First and Second Line Osimertinib Treatment Detected by Liquid Biopsy

Balázs Jóri, Stefanie Schatz, Len Kaller, Bettina Kah, Julia Roeper, Hayat O. Ramdani, Linda Diehl, Petra Hoffknecht, Christian Grohé, Frank Griesinger, Markus Tiemann, Lukas C. Heukamp and Markus Falk

**Table S1.** Patient treatment and alterations detected with liquid biopsy in the 56 patient's cohort of late stage NSCLC during disease progression under TKI treatment. (X) mutation present from a single nucleotide change; (XX) mutation present from two nucleotide changes leading to C797S: (c.2389T>A and c.2390G>C) ; *TP53* in bold letter because of *RB1* mutations suggesting a small-cell transformation SCLC. Abbreviations: erlotinib (ERL), gefitinib (GEF), rociletinib (ROC), afatinib (AFA), osimertinib (OSI). Varaiant of unknown significance (VUS).

| patient | EGFR driver confirmed by liquid biopsy | TKI received  | EGFR dependent resistance |       |       | EGFR Independent Putative Resistance |                                |                                    |                      |                    | Passenger Mutation                                                           |                                                                                                         |
|---------|----------------------------------------|---------------|---------------------------|-------|-------|--------------------------------------|--------------------------------|------------------------------------|----------------------|--------------------|------------------------------------------------------------------------------|---------------------------------------------------------------------------------------------------------|
|         |                                        |               | T790M                     | C797S | other | amplification                        | SCLC/SC C switch               | kinase switch                      | fusion               | alternate pathway  | (in)activating                                                               | VUS                                                                                                     |
| P15     | E746_A750del                           | OSI           |                           | X     |       |                                      |                                |                                    |                      |                    | <i>TP53</i> (R110L)                                                          | <i>PIK3CA</i> (K111del)                                                                                 |
| P55     | L858R                                  | OSI           |                           |       | T854A | <i>MET</i>                           |                                |                                    | <i>ALK-EML4</i> (v3) |                    | <i>TP53</i> (R248Q)                                                          | <i>MET</i> (A179T)                                                                                      |
| P29     | L858R                                  | OSI           |                           |       |       |                                      | <i>RB1</i> (R787*)             |                                    |                      |                    | <i>STK11</i> (L105*); <b><i>TP53</i></b> (G244V)                             |                                                                                                         |
| P27     | L858R                                  | OSI           |                           |       |       |                                      |                                |                                    |                      |                    | <i>TP53</i> (E336fs*10)                                                      | <i>KEAP1</i> (E134K)                                                                                    |
| P43     | L858R                                  | OSI           |                           |       |       |                                      |                                |                                    |                      |                    | <i>BRCA2</i> (E2981fs); <i>TP53</i> (Y234C)                                  | <i>ALK</i> (R1084H); <i>PDGFRA</i> (R829*)                                                              |
| P46     | L861Q                                  | OSI           |                           |       |       |                                      |                                |                                    |                      |                    |                                                                              | <i>BRCA1</i> (I562V)                                                                                    |
| P49     | E709G, G719S                           | OSI           |                           |       |       |                                      |                                |                                    |                      |                    | <i>TP53</i> (R156P, E298*)                                                   | <i>TSC2</i> (I723V); <i>ATM</i> (E586_G587delinsDC, A425V); <i>FGFR3</i> (E330Q); <i>CTNNB1</i> (K435N) |
| P20     | non                                    | OSI           |                           |       |       |                                      |                                |                                    |                      |                    |                                                                              |                                                                                                         |
| P30     | non                                    | OSI           |                           |       |       |                                      |                                |                                    |                      |                    |                                                                              |                                                                                                         |
| P44     | E746_S752delins V                      | ERL, OSI      | loss of                   |       | G724S |                                      |                                |                                    |                      |                    |                                                                              | <i>ATM</i> (K3004E)                                                                                     |
| P16     | E746_S752delins V                      | AFA, OSI, CRI | loss of                   |       |       | <i>EGFR</i>                          | <i>RB1</i> fusion (intergenic) |                                    |                      |                    | <b><i>TP53</i></b> (Q167*); <i>STK11-STK11</i> (I231M); <i>TSC2</i> (D1406N) | <i>CTNNB1</i> (I231M); <i>TSC2</i> (D1406N)                                                             |
| P51     | E746_A750del                           | AFA, OSI      | loss of                   |       |       | <i>MET</i>                           |                                |                                    |                      |                    | <i>TP53</i> (R175H)                                                          | <i>ROS1</i> (R448H)                                                                                     |
| P14     | L858R                                  | ERL, OSI      | loss of                   |       |       | <i>MET</i>                           |                                |                                    |                      |                    |                                                                              | <i>FGFR1</i> (R749H)                                                                                    |
| P32     | E746_A750del                           | AFA, OSI      | loss of                   |       |       |                                      |                                | <i>ERBB2</i> (V777L, I767M, S310Y) |                      | <i>KRAS</i> (G13D) | <i>BRCA2</i> (T3030fs, N2134fs); <i>TP53</i> (R249S)                         |                                                                                                         |

| Genetic Alterations in Lung Adenocarcinoma |                    |                       |                     |                 |                            |                  |                          |                                   |                                                  |                  |       |
|--------------------------------------------|--------------------|-----------------------|---------------------|-----------------|----------------------------|------------------|--------------------------|-----------------------------------|--------------------------------------------------|------------------|-------|
| Patient ID                                 | Primary Alteration | Secondary Alterations | Copy Number Changes | Gene Expression | Protein Expression         | Pathway Analysis | Therapeutic Implications | Prognostic Markers                | Response to Therapy                              | Survival Outcome | Notes |
| P37                                        | E746_A750del       | ERL, OSI              | loss of             |                 |                            | RET-RUFY1        | PIK3CA (E545K, E542K)    | TP53 (Q136P)                      | EGFR (R932C); PIK3CA (R87T)                      |                  |       |
| P06                                        | E746_A750del       | AFA, OSI              | loss of             |                 |                            |                  | KRAS (G12D)              | ATR (R2148*); TP53 (W91*)         | ATR (H1520R); MTOR (D2512Y, R2505*); RET (A641T) |                  |       |
| P42                                        | E746_A750del       | AFA, OSI              | loss of             |                 |                            |                  | PIK3CA (E545K)           | CDKN2A fusion (intergenic)        | ERBB2 (T216M)                                    |                  |       |
| P41                                        | E746_A750del       | AFA, OSI              | loss of             |                 |                            |                  |                          | TP53 (Q192*)                      |                                                  |                  |       |
| P19                                        | L747_S752del       | ERL, AFA, OSI         | loss of             |                 |                            |                  |                          |                                   | MTOR (M2366V)                                    |                  |       |
| P04                                        | K745_A750delins K  | ERL, OSI              | loss of             |                 |                            |                  |                          | TP53 (R158P)                      |                                                  |                  |       |
| P17                                        | L747_T751delins P  | GEF, AFA, OSI         | loss of             |                 |                            |                  |                          |                                   | PDGFRA (E336G)                                   |                  |       |
| P11                                        | E746_A750del       | GEF, OSI              | loss of             |                 |                            |                  |                          |                                   |                                                  |                  |       |
| P38                                        | E746_A750del       | GEF, OSI              | loss of             |                 |                            |                  |                          |                                   | ALK (P230Q), TSC2 (R905Q)                        |                  |       |
| P35                                        | L858R              | AFA, OSI              | X                   | X               | L718V, L718Q, L792H, G796S | EGFR             |                          | TP53 (c.376-2A>T)                 | FGFR3 (D760N); TSC2 (R1451S); BRCA1 (K556N)      |                  |       |
| P31                                        | L747_P753delins S  | GEF, ERL, AFA, OSI    | X                   | X               |                            | EGFR             |                          |                                   |                                                  |                  |       |
| P08                                        | L858R              | ERL, OSI              | X                   | X               |                            | RB1 (G203fs)     |                          | TP53 (E198*)                      |                                                  |                  |       |
| P12                                        | L858R              | ERL, OSI              | X                   | X               |                            |                  | ERBB2 (S310F)            |                                   | ALK (G35fs)                                      |                  |       |
| P23                                        | L858R              | AFA, OSI              | X                   | X               |                            |                  | AGK-BRAF (S37Y)          | CTNNB1 (S37Y)                     |                                                  |                  |       |
| P56                                        | L747_P753delins S  | AFA, OSI              | X                   | X               |                            |                  | DLG1-BRAF (S37Y)         | IDH2 (R140Q); TP53 (Q104*, S241F) | EGFR (M1002T)                                    |                  |       |
| P13                                        | E746_T751delins A  | AFA, OSI              | X                   | X               |                            |                  | CTNNB1 (S37Y)            | TP53 (G199V)                      |                                                  |                  |       |
| P33                                        | E746_A750del       | AFA, OSI              | X                   | X               |                            |                  | MTOR (Y1974H)            |                                   | ATM (H1352Q)                                     |                  |       |
| P24                                        | L747_T751delins P  | AFA, OSI              | X                   | X               |                            |                  |                          | TP53 (R248Q)                      |                                                  |                  |       |
| P02                                        | K745_A750delins K  | AFA, ROC, OSI         | X                   | X               |                            |                  |                          |                                   | TSC1 (A659V)                                     |                  |       |
| P18                                        | E746_A750del       | ERL, OSI              | X                   | X               |                            |                  |                          | TP53 (V157F)                      | EGFR (G459A)                                     |                  |       |
| P39                                        | E746_A750del       | GEF, OSI              | X                   | X               |                            |                  |                          | CTNNB1 (S37Y)                     | ATM (N1719D)                                     |                  |       |
| P03                                        | K745_A750delins K  | ERL, OSI              | X                   | XX              | V843I                      | EGFR             | KRAS (A146V)             |                                   | DDR2 (S215F), ROS1 (I595del)                     |                  |       |
| P05                                        | E746_A750del       | ERL, ROC, OSI         | X                   | XX              |                            |                  | TACC-FGF R3              |                                   | TSC1 (R992T)                                     |                  |       |
| P48                                        | E746_A750del       | AFA, OSI              | X                   | XX              |                            |                  |                          | TP53 (R158L)                      |                                                  |                  |       |
| P28                                        | E746_A750del       | AFA, OSI              | X                   | XX              |                            |                  |                          |                                   | ARAF (G499E), MET (M1247T), TP53 (I162N)         |                  |       |
| P36                                        | L858R              | ERL, OSI              | X                   |                 | L718Q                      | MET              | RB1                      | TP53 (V73fs)                      |                                                  |                  |       |

|     |                      |                       |   |                                                                       | (S114fs,<br>c.1960+1G<br>>A) |                 |  |
|-----|----------------------|-----------------------|---|-----------------------------------------------------------------------|------------------------------|-----------------|--|
| P54 | L858R                | AFA, OSI              | X | L792H                                                                 | RET<br>(V804L)               | TP53 (I254N)    |  |
| P07 | L858R                | AFA, OSI              | X |                                                                       |                              |                 |  |
| P22 | E746_A750del         | AFA, OSI              | X | ATR (S2264L),<br>ATM NFE2L2<br>(c.2921+1G>T) (L266F), EGFR<br>(R962C) |                              |                 |  |
| P34 | E746_A750del         | AFA, OSI              | X | TP53 (R248Q)                                                          |                              |                 |  |
| P01 | L747_P753delins<br>Q | ERL, OSI              | X | ATM<br>(R3008H)                                                       |                              |                 |  |
| P21 | L858R                | GEF, OSI,<br>AFA      | X | TP53 (V216L) ERBB2<br>(D1252N)                                        |                              |                 |  |
| P10 | E746_A750del         | AFA, GEF,<br>ERL, OSI |   | PTEN<br>(S399fs)                                                      | TP53 (H179Y)                 | MTOR<br>(R731H) |  |
| P52 | E746_A750del         | AFA, GEF,<br>OSI      |   | TP53 (R249G)                                                          |                              |                 |  |
| P26 | E746_A750del         | AFA, OSI              |   |                                                                       |                              |                 |  |
| P45 | E709V, G719C         | ERL, OSI              |   | TP53<br>(I195N,W53*)                                                  |                              |                 |  |
| P53 | non                  | AFA, GEF,<br>OSI      |   |                                                                       |                              |                 |  |
| P09 | non                  | AFA, OSI              |   |                                                                       |                              |                 |  |
| P47 | non                  | AFA, OSI              |   |                                                                       |                              |                 |  |
| P50 | non                  | AFA, OSI              |   |                                                                       |                              |                 |  |
| P40 | non                  | ERL, OSI              |   |                                                                       |                              |                 |  |
| P25 | non                  | GEF, OSI              |   |                                                                       |                              |                 |  |
